# Supplementary material for: GaCl3-assisted [2 + 3] cycloaddition: A route to tetrazaphospholes
Source: Royal Society of Chemistry journal article supplement (doi:10.1039/b517459g), 2006-01-01
Supplement: b517459g.pdf [file b517459g.pdf]

# Supplementary Information

## *GaCl<sub>3</sub> Assisted [2+3] Cycloaddition: A Route to Tetrazaphospholes*

Peter Mayer, Axel Schulz\*, and Alexander Villinger

### Experimental Section

*General Remarks.* Solvents were freshly distilled, dried, and stored under argon. NMR: JEOL Eclipse 400 (<sup>1</sup>H, <sup>13</sup>C chemical shifts refer to  $\delta_{\text{TMS}} = 0.00$ ; <sup>31</sup>P to  $\delta_{\text{H}_3\text{PO}_4(85\%)} = 0.00$ ). Raman: Perkin-Elmer Spectrum 2000R NIR FT equipped with a Nd:YAG laser (1064nm). CHN analyses: Analysator Elementar Vario EL. MS: JEOL MStation JMS 700. Melting points are uncorrected (Büchi B540). Aryl-N=P-Cl (aryl = Mes\* = 2,4,6-*t*Bu<sub>3</sub>C<sub>6</sub>H<sub>2</sub>),<sup>1</sup> were prepared according to the procedure given in the literature and can be prepared in large quantities.

*Synthesis of 3:* A solution of TMS-N<sub>3</sub> (0.115 g, 1.0 mmol) in benzene (10mL) was added dropwise to a stirred solution of Mes\*NPCl (0.326 g, 1.0 mmol) in benzene (10mL) at 5 °C. To the red solution, GaCl<sub>3</sub> (0.194 g, 1.1 mmol) in benzene (20 mL) was quickly added via syringe resulting in a colourless solution. Removal of the solvent in vacuo yielded **3** as fine, colourless, needlelike crystals, yield 0.498 g, 0.98 mmol, 98%; mp 145-150 °C (dec.); anal. calcd. % (found): C 42.52 (42.06), H 5.75 (5.35), N 11.02 (10.61); Raman: 2969 (87), 2911 (81), 2788 (14), 2717 (16), 1597 (49), 1466 (52), 1446 (52), 1397 (29), 1366 (30), 1290 (40), 1257 (42), 1201 (45), 1178 (37), 1148 (40), 1044 (27), 989 (23), 924 (33), 822 (64), 778 (28), 755 (29), 693 (69), 651 (26), 573 (38), 476 (34), 414 (46), 402 (46), 362 (100), 287 (41), 265 (50), 254 (51), 202 (41), 145 (25); NMR (CD<sub>2</sub>Cl<sub>2</sub>): <sup>1</sup>H 1.05 (s, 18H), 1.37 (s, 9H), 7.66 (s, 2H); <sup>13</sup>C{<sup>1</sup>H} 30.9 (s, C9(CH<sub>3</sub>)<sub>3</sub>), 32.9 (d, <sup>5</sup>J<sub>CP</sub> = 3.8 Hz, C5 (CH<sub>3</sub>)<sub>3</sub>), 35.4 (s, C9), 37.0 (s, C5), 124.8 (s, C3), 127.9 (d, <sup>2</sup>J<sub>PC</sub> = 6.9 Hz, C2), 147.1 (d, <sup>3</sup>J<sub>PC</sub> = 3.1 Hz, C1), 154.6 (s, C4); <sup>31</sup>P{<sup>1</sup>H} 226.7 (s); <sup>31</sup>P MAS NMR (25 °C,  $\omega_{\text{rot}} = 15$  kHz):  $\delta_{\text{iso}}$  223 (s); m/z (%): 332 (0.3) [**2**]<sup>+</sup>, 287 (0.8) [**2**-NP]<sup>+</sup>, 261 (4.0) [Mes\*NH<sub>2</sub>]<sup>+</sup>, 259 (4.6) [Mes\*+Me]<sup>+</sup>, 258 (7.9) [**2**-N<sub>3</sub>P]<sup>+</sup>, 246 (11.9) [Mes\*]<sup>+</sup>, 245 (7.3) [Mes\*-H]<sup>+</sup>, 244 (37.8) [Mes\*-2 H]<sup>+</sup>, 228 (1.8), 202 (2.1) [Mes\*-C<sub>3</sub>H<sub>5</sub>]<sup>+</sup>, 188 (4.4) [Mes\*-'Bu]<sup>+</sup>, 132 (6.4) [Mes\*-2 'Bu-2 H]<sup>+</sup>, 56 (16.4) ['Bu]<sup>+</sup>, 41 (30.8) [C<sub>3</sub>H<sub>5</sub>]<sup>+</sup>, 39 (10.4) [C<sub>3</sub>H<sub>3</sub>]<sup>+</sup>, 36 (4.9) [HCl]<sup>+</sup>, 28 (100) [N<sub>2</sub>]<sup>+</sup>. Crystals suitable for x-ray diffraction analysis were obtained by dissolving **3** in a minimum dichloromethane at RT and cooling to -5 °C for 12 h. Details of the X-ray data sets is given in Table S1. (*Note:* The 'Bu groups are strongly disordered).

## Crystallographic Details

**Table S1.** Crystallographic Data of **3**.

|                                            | <b>3</b>                                                                                      |
|--------------------------------------------|-----------------------------------------------------------------------------------------------|
| formula                                    | N <sub>4</sub> P <sub>1</sub> Ga <sub>1</sub> Cl <sub>3</sub> C <sub>18</sub> H <sub>29</sub> |
| Fw                                         | 508.5                                                                                         |
| crystal system                             | monoclinic                                                                                    |
| space group                                | <i>P</i> 2 <sub>1</sub> / <i>m</i> (No. 11)                                                   |
| <i>a</i> , Å                               | 6.0103(2)                                                                                     |
| <i>b</i> , Å                               | 14.8760(4)                                                                                    |
| <i>c</i> , Å                               | 13.4368(4)                                                                                    |
| $\alpha$ , deg.                            | 90                                                                                            |
| $\beta$ , deg.                             | 92.2260(13)                                                                                   |
| $\gamma$ , deg.                            | 90                                                                                            |
| <i>V</i> , Å <sup>3</sup>                  | 1200.47(6)                                                                                    |
| <i>Z</i>                                   | 2                                                                                             |
| $\rho_{\text{calc.}}$ , g cm <sup>-3</sup> | 1.407                                                                                         |
| $\mu$ , mm <sup>-1</sup>                   | 1.557                                                                                         |
| $\lambda_{\text{MoK}\alpha}$ , Å           | 0.71073                                                                                       |
| <i>T</i> , K                               | 200                                                                                           |
| reflns. collected                          | 22291                                                                                         |
| independent reflns.                        | 2857                                                                                          |
| obsd. reflns.                              | 2213                                                                                          |
| R <sub>int</sub>                           | 0.119                                                                                         |
| <i>F</i> (000)                             | 888                                                                                           |
| <i>R</i> <sub>1</sub> <sup>a</sup>         | 0.048                                                                                         |
| w <i>R</i> <sub>2</sub> <sup>b</sup>       | 0.124                                                                                         |
| Goof                                       | 1.09                                                                                          |
| no. parameters/restraints                  | 150                                                                                           |
| CCDC #                                     | 292917                                                                                        |

<sup>a</sup> final R [*I* > 2σ(*I*)], <sup>b</sup> R indices (all data)

**Table S2.** Selected bond distances (Å)

|        |          |
|--------|----------|
| Ga-Cl1 | 2.146(1) |
| Ga-Cl2 | 2.136(1) |
| Ga-N1  | 1.992(4) |
| P-N1   | 1.631(4) |
| P-N4   | 1.664(3) |
| N1-N2  | 1.374(5) |
| N2-N3  | 1.286(5) |
| N3-N4  | 1.355(5) |
| N4-C1  | 1.460(5) |
| C1-C2  | 1.404(3) |
| C2-C3  | 1.398(4) |
| C2-C5  | 1.559(4) |
| C3-C4  | 1.385(4) |
| C4-C9  | 1.535(6) |
| C5-C6  | 1.539(9) |

**Table S3.** Selected bond angles (°)

---

|                         |            |
|-------------------------|------------|
| Cl1-Ga-Cl2              | 114.28(3)  |
| Cl1-Ga-N1               | 101.9(1)   |
| Cl1-Ga-Cl2              | 114.28(3)  |
| Cl2-Ga-N1               | 105.00(6)  |
| Cl2-Ga-Cl2              | 114.56(6)  |
| Cl2 <sup>i</sup> -Ga-N1 | 105.00(6)  |
| N1-P-N4                 | 88.2(2)    |
| Ga-N1-P                 | 129.7(2)   |
| Ga-N1-N2                | 116.1(3)   |
| P-N1-N2                 | 114.43(3)  |
| N1-N2-N3                | 111.8(4)   |
| N2-N3-N4                | 111.5(3)   |
| P-N4-N3                 | 114.2(3)   |
| P-N4-C1                 | 128.0(3)   |
| N3-N4-C1                | 117.8(3)   |
| N4-C1-C2                | 118.06(18) |
| N4-C1-C2                | 118.0 (2)  |
| C2-C1-C2 <sup>i</sup>   | 123.9(3)   |
| C1-C2-C3                | 115.9(3)   |

---

## Comparison between Experiment and Theory (<sup>31</sup>P NMR, Structure, Frequency, Bonding)

**Computational Details.** Our goal was to compare the structures and energetics of different GaCl<sub>3</sub> adducts and isomers of the tetraazaphosphole. Therefore it was important to carry out the calculations in such a way that the results could be compared reliably with each other. The structural and vibrational data of all monomeric and dimeric species and adducts were calculated by using the hybrid density functional theory (B3LYP) with the program package Gaussian 98.<sup>2</sup> A 6-31G(d,p) standard basis set was applied for all atoms, except for gallium, for which a multielectron adjusted quasirelativistic effective core potentials (ECP28MWB) of the Stuttgart group with the following electronic configuration Ga: [Ar]d<sup>10</sup> was used.<sup>3</sup> For Ga a (5s5p1d)/[3s3p1d] valence basis set (311,311,1) was utilized (d-functions with the coefficient = 0.207). All stationary points were characterized as minima by a frequency analysis. Frequency data can be obtained from Tables S6, and all energy data are given in Tables S5. NMR data were calculated utilizing the GIAO method and are summarized in Table S4.

NBO analyses<sup>4</sup> and MO analyses were carried out to investigate the bonding in all molecules at the B3LYP level utilizing the optimized B3LYP geometry. The NBO data can be obtained from the authors.

**Table S4** NMR shifts Computed NMR shifts:

$$\delta_{\text{Subst.}} = \sigma_{\text{iso./H}_3\text{PO}_4} - \sigma_{\text{iso./Subst.}} \text{ with } \delta \text{ H}_3\text{PO}_4 = 328.35 \text{ ppm (B3LYP, GIAO).}^5$$

| Species                       | $\sigma_{\text{iso P}}$ | $\delta \text{ P}$ [ppm] | Experimental value in solution [ppm]                      |
|-------------------------------|-------------------------|--------------------------|-----------------------------------------------------------|
| <b>2</b>                      | 84.9                    | 243.5                    | 245.1                                                     |
| <b>3 (2+GaCl<sub>3</sub>)</b> | 98.9                    | 229.5                    | 228.8 (benzene), 226.7 (CH <sub>2</sub> Cl <sub>2</sub> ) |

**Table S5**Thermodynamics  
B3LYP/6-31G(d,p)

| species           | E(tot) [a.u.] | E(0) [a.u.]  | E(298) [a.u.] | H(298) [a.u.] | G(298) [a.u.] |
|-------------------|---------------|--------------|---------------|---------------|---------------|
| GaCl <sub>3</sub> | -1382.822872  | -1382.819180 | -1382.813402  | -1382.812458  | -1382.850241  |
| pn4               | -1263.728230  | -1263.278776 | -1263.254116  | -1263.253171  | -1263.331055  |
| pn4_b             | -1263.728136  | -1263.278154 | -1263.253669  | -1263.252725  | -1263.330363  |
| pn4_ga            | -2646.567612  | -2646.112550 | -2646.080320  | -2646.079375  | -2646.179385  |
| pn4_ga_b2         | -2646.567536  | -2646.112400 | -2646.080212  | -2646.079267  | -2646.178814  |
| pn4_ga_2          | -2646.573808  | -2646.119082 | -2646.086834  | -2646.085890  | -2646.184684  |
| pn4_ga_3          | -2646.532213  | -2646.078348 | -2646.045521  | -2646.044576  | -2646.146750  |
| pn4_ga_4          | -2646.553874  | -2646.099019 | -2646.066830  | -2646.065885  | -2646.162705  |

| Erel (isomers)                      | $\Delta E(\text{tot})$ [a.u.] | $\Delta E(0)$ [a.u.] | $\Delta E(298)$ [a.u.] | $\Delta H(298)$ [a.u.] | $\Delta G(298)$ [a.u.] | $\Delta G(298)$ [kcal/mol] |
|-------------------------------------|-------------------------------|----------------------|------------------------|------------------------|------------------------|----------------------------|
| pn4_ga                              | 0.006196                      | 0.006532             | 0.006514               | 0.006515               | 0.005299               | 3.325173                   |
| pn4_ga_b2                           | 0.006272                      | 0.006682             | 0.006622               | 0.006623               | 0.005870               | 3.683481                   |
| pn4_ga_2                            | 0.000000                      | 0.000000             | 0.000000               | 0.000000               | 0.000000               | 0.000000                   |
| pn4_ga_3                            | 0.041596                      | 0.040734             | 0.041313               | 0.041314               | 0.037934               | 23.803947                  |
| pn4_ga_4                            | 0.019934                      | 0.020063             | 0.020004               | 0.020005               | 0.021979               | 13.792032                  |
| $\Delta E(\text{adduct formation})$ | -0.022706                     | -0.021126            | -0.019316              | -0.020261              | -0.003388              | -2.126002                  |
|                                     | -0.022800                     | -0.021748            | -0.019763              | -0.020707              | -0.004080              | -2.560239                  |

**R\*** = 2,4,6-*t*Bu<sub>3</sub>C<sub>6</sub>H<sub>2</sub>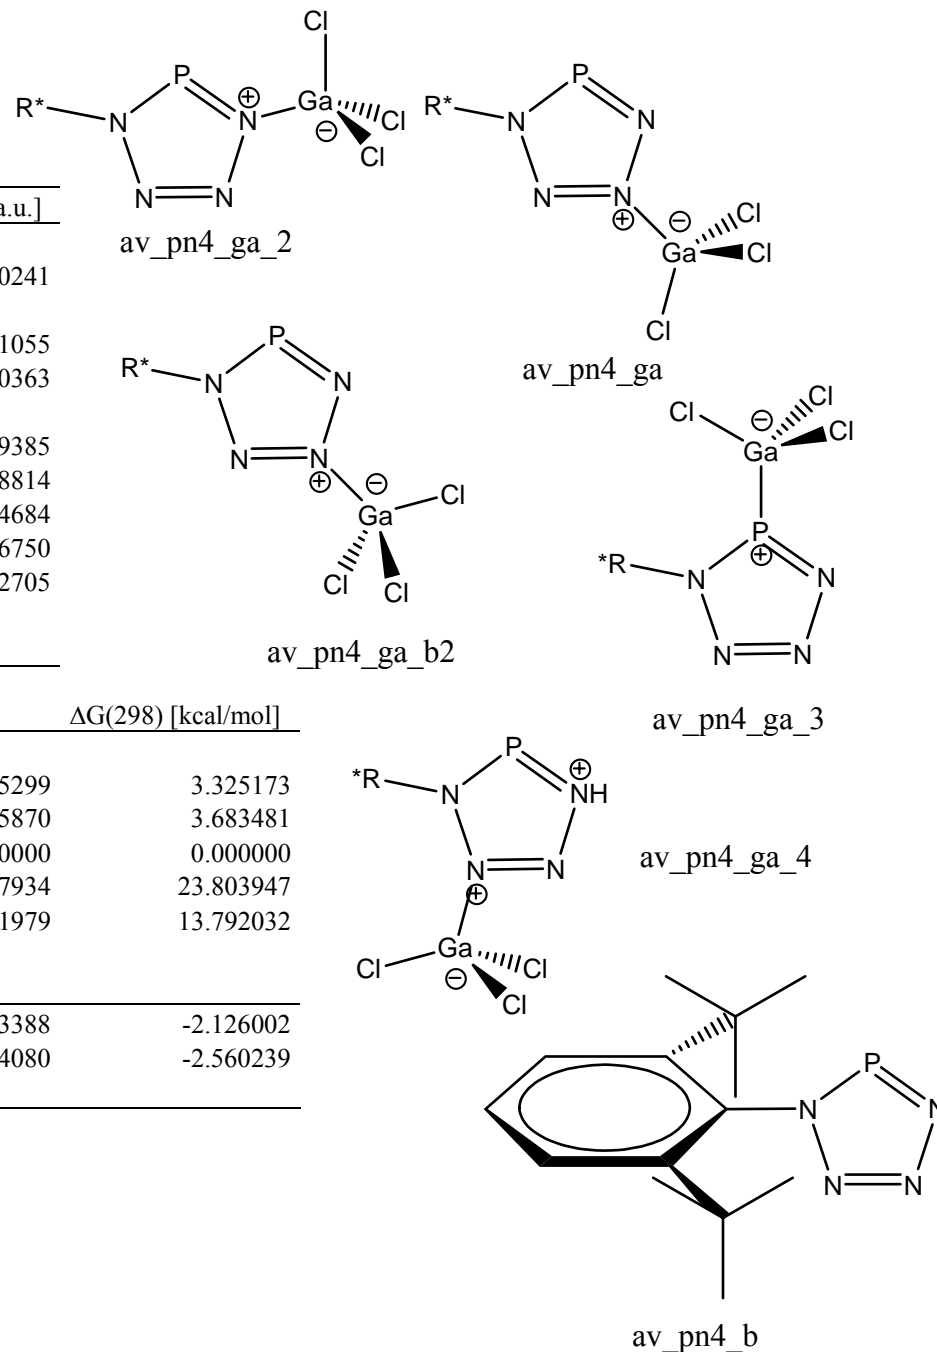

**Table S6.** Frequency Analysis of av\_pn4\_ga\_2  
(R\* = 2,4,6-tri-*tert*-butylphenyl):

| symmetry | frequency | IR intensity |
|----------|-----------|--------------|
| A        | 13.1779   | 0.0151       |
| A        | 17.7840   | 17.7840      |
| A        | 20.2901   | 0.5031       |
| A        | 29.2732   | 0.0248       |
| A        | 50.8742   | 0.6719       |
| A        | 55.4777   | 0.0006       |
| A        | 61.1984   | 0.3593       |
| A        | 65.3323   | 0.0014       |
| A        | 86.2991   | 1.3081       |
| A        | 88.1741   | 1.9862       |
| A        | 112.9581  | 2.0680       |
| A        | 116.5806  | 0.5659       |
| A        | 119.8694  | 6.0754       |
| A        | 133.4686  | 0.2554       |
| A        | 135.0440  | 4.7861       |
| A        | 146.2520  | 1.4467       |
| A        | 155.0832  | 26.9120      |
| A        | 171.2529  | 2.4945       |
| A        | 174.0966  | 36.1546      |
| A        | 195.3677  | 3.9657       |
| A        | 221.6944  | 0.1087       |
| A        | 225.8158  | 0.5430       |
| A        | 234.9702  | 1.3058       |
| A        | 241.7889  | 2.3175       |
| A        | 249.3685  | 0.0977       |
| A        | 254.9029  | 4.1826       |
| A        | 257.5000  | 10.2516      |
| A        | 261.2000  | 0.0763       |
| A        | 278.0257  | 0.5061       |
| A        | 295.0059  | 0.4814       |
| A        | 297.8019  | 1.4920       |
| A        | 307.2819  | 1.2978       |
| A        | 314.8729  | 2.8061       |
| A        | 331.7813  | 0.0652       |
| A        | 334.7801  | 26.7889      |
| A        | 337.9698  | 0.0128       |
| A        | 343.7603  | 0.3628       |
| A        | 355.5780  | 0.1916       |
| A        | 356.5130  | 0.6373       |
| A        | 380.1827  | 0.0769       |
| A        | 388.3100  | 61.7863      |
| A        | 392.4013  | 23.3087      |
| A        | 399.2414  | 0.8781       |
| A        | 403.1103  | 1.5971       |
| A        | 408.5914  | 83.1959      |
| A        | 424.4780  | 0.4251       |
| A        | 430.7796  | 0.5596       |
| A        | 476.6326  | 0.6560       |
| A        | 484.3474  | 3.6564       |
| A        | 498.9448  | 18.3635      |
| A        | 523.2971  | 9.9310       |
| A        | 556.8034  | 2.1411       |
| A        | 574.8331  | 0.2517       |
| A        | 587.3439  | 6.2650       |
| A        | 636.7627  | 0.0179       |
| A        | 650.6574  | 1.3242       |
| A        | 662.5492  | 6.7448       |
| A        | 697.7903  | 29.1243      |
| A        | 704.9161  | 0.0228       |

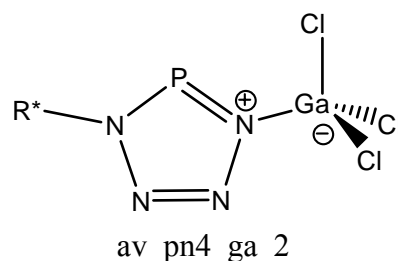

|   |           |          |
|---|-----------|----------|
| A | 757.7065  | 0.1320   |
| A | 767.6146  | 5.7282   |
| A | 787.8411  | 6.3192   |
| A | 820.4857  | 32.9128  |
| A | 826.0944  | 5.7343   |
| A | 889.2271  | 7.2242   |
| A | 904.9358  | 6.4788   |
| A | 911.9676  | 1.5070   |
| A | 921.1947  | 0.0872   |
| A | 930.1782  | 2.0594   |
| A | 930.8577  | 0.7125   |
| A | 935.4764  | 2.5273   |
| A | 938.9272  | 0.1163   |
| A | 939.1889  | 2.0786   |
| A | 944.2454  | 1.6565   |
| A | 962.5071  | 0.8674   |
| A | 962.6055  | 0.3313   |
| A | 964.6761  | 0.2308   |
| A | 1004.1341 | 38.2546  |
| A | 1025.0549 | 9.4578   |
| A | 1043.4861 | 0.8058   |
| A | 1046.8456 | 0.8336   |
| A | 1048.0833 | 0.4130   |
| A | 1049.1836 | 1.0528   |
| A | 1052.5411 | 0.5435   |
| A | 1053.3479 | 0.1261   |
| A | 1056.8376 | 0.5034   |
| A | 1076.8247 | 109.6404 |
| A | 1153.6004 | 9.3872   |
| A | 1181.0718 | 0.9012   |
| A | 1211.0812 | 0.2637   |
| A | 1226.6879 | 2.2297   |
| A | 1227.0561 | 1.1986   |
| A | 1231.1244 | 4.7950   |
| A | 1232.0944 | 2.1817   |
| A | 1232.4062 | 1.6061   |
| A | 1243.8069 | 32.4915  |
| A | 1263.0306 | 47.1378  |
| A | 1281.4118 | 3.4817   |
| A | 1300.1961 | 3.4642   |
| A | 1305.7881 | 18.9142  |
| A | 1312.9391 | 7.6748   |
| A | 1378.1411 | 1.1614   |
| A | 1409.3701 | 1.8956   |
| A | 1410.0755 | 2.8541   |
| A | 1411.6729 | 4.9181   |
| A | 1412.9575 | 3.7451   |
| A | 1416.4344 | 11.9773  |
| A | 1416.7784 | 0.8772   |
| A | 1444.8193 | 5.8902   |
| A | 1448.3093 | 3.2958   |
| A | 1448.7627 | 0.2067   |
| A | 1458.8828 | 20.4865  |
| A | 1462.1315 | 21.6000  |
| A | 1492.1975 | 0.5229   |
| A | 1492.6248 | 0.0255   |
| A | 1495.0545 | 0.0131   |
| A | 1496.2897 | 2.9114   |
| A | 1497.2543 | 2.1898   |
| A | 1498.4172 | 0.0114   |
| A | 1503.5069 | 0.0950   |
| A | 1504.2342 | 1.6251   |

|   |           |         |
|---|-----------|---------|
| A | 1505.7456 | 1.1435  |
| A | 1517.6252 | 6.7408  |
| A | 1519.2056 | 5.9027  |
| A | 1519.4947 | 0.9323  |
| A | 1521.1374 | 5.1849  |
| A | 1524.1480 | 8.4132  |
| A | 1524.7953 | 7.5234  |
| A | 1534.4548 | 11.8371 |
| A | 1543.1756 | 11.4439 |
| A | 1543.7200 | 4.2812  |
| A | 1609.0571 | 10.8108 |
| A | 1644.3172 | 40.4112 |
| A | 3041.7671 | 22.3596 |
| A | 3042.6297 | 22.1482 |
| A | 3045.5781 | 12.5541 |
| A | 3045.9798 | 34.2781 |
| A | 3049.4259 | 18.1211 |
| A | 3052.3118 | 10.0530 |
| A | 3052.7436 | 12.2792 |
| A | 3070.0403 | 12.4317 |
| A | 3070.2368 | 17.5577 |
| A | 3113.0783 | 0.1952  |
| A | 3114.0438 | 2.4283  |
| A | 3115.1318 | 56.7441 |
| A | 3115.5046 | 17.9102 |
| A | 3115.8214 | 30.6690 |
| A | 3120.4737 | 1.4418  |
| A | 3120.5523 | 0.6003  |
| A | 3121.1337 | 25.5806 |
| A | 3121.8826 | 99.9746 |
| A | 3123.8447 | 40.4370 |
| A | 3125.2714 | 2.3124  |
| A | 3125.7978 | 69.0324 |
| A | 3127.3248 | 10.8221 |
| A | 3127.7648 | 18.2070 |
| A | 3135.0823 | 90.8559 |
| A | 3135.4081 | 3.2936  |
| A | 3163.9546 | 8.7324  |
| A | 3164.9532 | 40.4223 |
| A | 3263.8101 | 5.0376  |
| A | 3290.4647 | 1.0672  |



## References

---

- (1) (a) G. David, E. Niecke, M. Nieger, M.; V. von der Gönna, W. W. Schoeller, *Chem. Ber.*, 1993, **126**, 1513–1517; (b) E. Niecke, M. Nieger, F. Reichert, *Angew. Chem.* 1988, **100**, 1781–1782. (c) N. Burford, J. A. C. Clyburne, P. Losier, T. M. Parks, In *Handbuch der Präparativen Anorganischen Chemie*, 4<sup>th</sup> ed., Engl.; Karsch, H. H. Ed.; Thieme-Verlag: Stuttgart.
- (2) Gaussian 98, Revision A.6, Gaussian Inc.: Pittsburgh PA, 1998.
- (3) (a) A. Bergner, M. Dolg, W. Kuechle, H. Stoll, H. Preuss, *Mol. Phys.*, 1993, **80**, 1431; (b) T. Leininger, A. Berning, A. Nicklass, H. Stoll, H. Werner, H.-J. Flad, *Chem. Phys.*, 1997, **217**, 19.
- (4) NBO Version 3.1, E. D. Glendening, A. E. Reed, J. E. Carpenter, F. Weinhold
- (5) C. J. Jameson, A. De Dios, A. K. Jameson, *Chem. Phys. Lett.*, 1990, **176**, 575–582.
